## Diagnostic reliability of quantitative flow ratio for detection of myocardial ischemia compared with other angiographic and experience-dependent visual predicted indices

M. Otsuka, N. Satomi, M. Kahata, S. Kitagawa, A. Kumagai, K. Inoue, H. Koganei, K. Enta, Y. Ishii

*Ogikubo Hospital, Tokyo, Japan*

**Funding Acknowledgement:** Type of funding source: None

**Background:** Quantitative flow ratio (QFR) is an image-based virtual fractional flow reserve (FFR) computed by three dimensional quantitative coronary angiography (3D-QCA) and estimated flow velocity. Several studies have reported that QFR had a good diagnostic performance as compared with wire-based FFR or instantaneous wave-free ratio (iFR).

**Purpose:** We compared the diagnostic reliability of QFR for detection of myocardial ischemia with other angiographic and visual predicted indices.

**Methods:** In 301 coronary lesions (263 patients) from our QFR database for previously-reported two studies, the diagnostic reliability of QFR, several angiographic and visual predicted indices were investigated using

ROC analysis as reference of  $FFR \leq 0.8$  or  $iFR \leq 0.89$ . Visual predicted FFR were estimated by 3 physicians (25-year experienced expert, 10-year experienced senior physician and 3-year experienced trainee) blinded to other indices.

**Results:** Area under the curve (AUC) of each index in ROC analysis is shown in Table.

**Conclusion:** QFR was reliable index detecting myocardial ischemia compared with other angiographic and experience-dependent visual predicted indices.

Diagnostic performance of each index for  $FFR \leq 0.80$  and  $iFR \leq 0.89$

|                             | for $FFR \leq 0.80$ |      | for $iFR \leq 0.89$ |      |
|-----------------------------|---------------------|------|---------------------|------|
|                             | n                   | AUC  | n                   | AUC  |
| <b>3D-QCA</b>               |                     |      |                     |      |
| Min. lumen diam.            | 220                 | 0.74 | 156                 | 0.69 |
| % Diam stenosis             | 220                 | 0.73 | 156                 | 0.66 |
| % Area stenosis             | 220                 | 0.67 | 156                 | 0.64 |
| QFR                         | 220                 | 0.92 | 156                 | 0.91 |
| <b>Visual predicted FFR</b> |                     |      |                     |      |
| by expert physician         | 69                  | 0.82 | 69                  | 0.77 |
| by senior physician         | 69                  | 0.72 | 69                  | 0.68 |
| by trainee                  | 69                  | 0.68 | 69                  | 0.55 |
